# Supplementary material for: Exposure-dependent Ag+release from silver nanoparticles and its complexation in AgS2sites in primary murine macrophages
Source: Royal Society of Chemistry journal article supplement (doi:10.1039/c5nr00353a), 2015-01-01

## Supporting Information

### Exposure-dependent Ag<sup>+</sup> release from silver nanoparticles and its complexation in AgS<sub>2</sub> sites in primary murine macrophages

*Giulia Veronesi\**, Catherine Aude-Garcia, Isabelle Kieffer, Thomas Gallon, Pascale Delangle, Nathalie Herlin-Boime, Thierry Rabilloud and Marie Carrière\*

**Figure S1:** Transmission electron microscopy imaging of Ag-NP intracellular accumulation. Murine primary macrophages were exposed for 24 h to 5 µg/mL of Ag-NPs then embedded in epoxy resin, cut and observed by transmission electron microscopy (a) and scanning-transmission electron microscopy (b). These images show electron-dense deposits (\*) composed of Ag as proved by their energy dispersive spectroscopy analysis (c). E.c., extracellular compartment; c., cytoplasm; p., phagosome; n., nucleus.

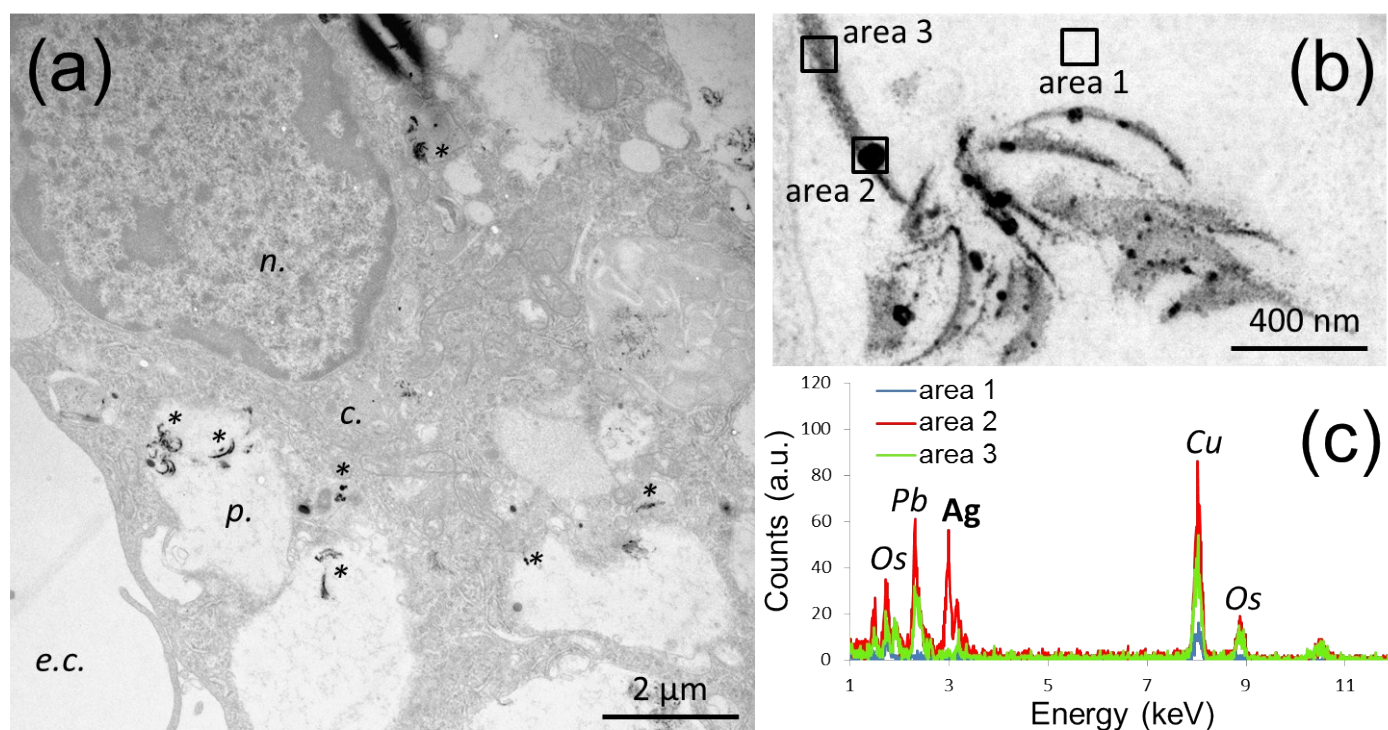

**Figure S2:** Imaginary part of the Fourier-Transformed Ag K-edge EXAFS spectra of silver nanoparticles and of primary murine macrophages exposed to silver nanoparticles following different protocols: 6 h or 24 h exposure to a single 5  $\mu\text{g/mL}$  dose, or chronic exposure over 96 h to 1.25  $\mu\text{g/mL}$  daily. Experimental data (black solid curves) were fitted with *ab initio* models (red dashed curves, best fits); an Ag-S contribution (green curve) must be included in the model to correctly reproduce the [1.5; 2.5]  $\text{\AA}$  region of the spectra of cellular samples.

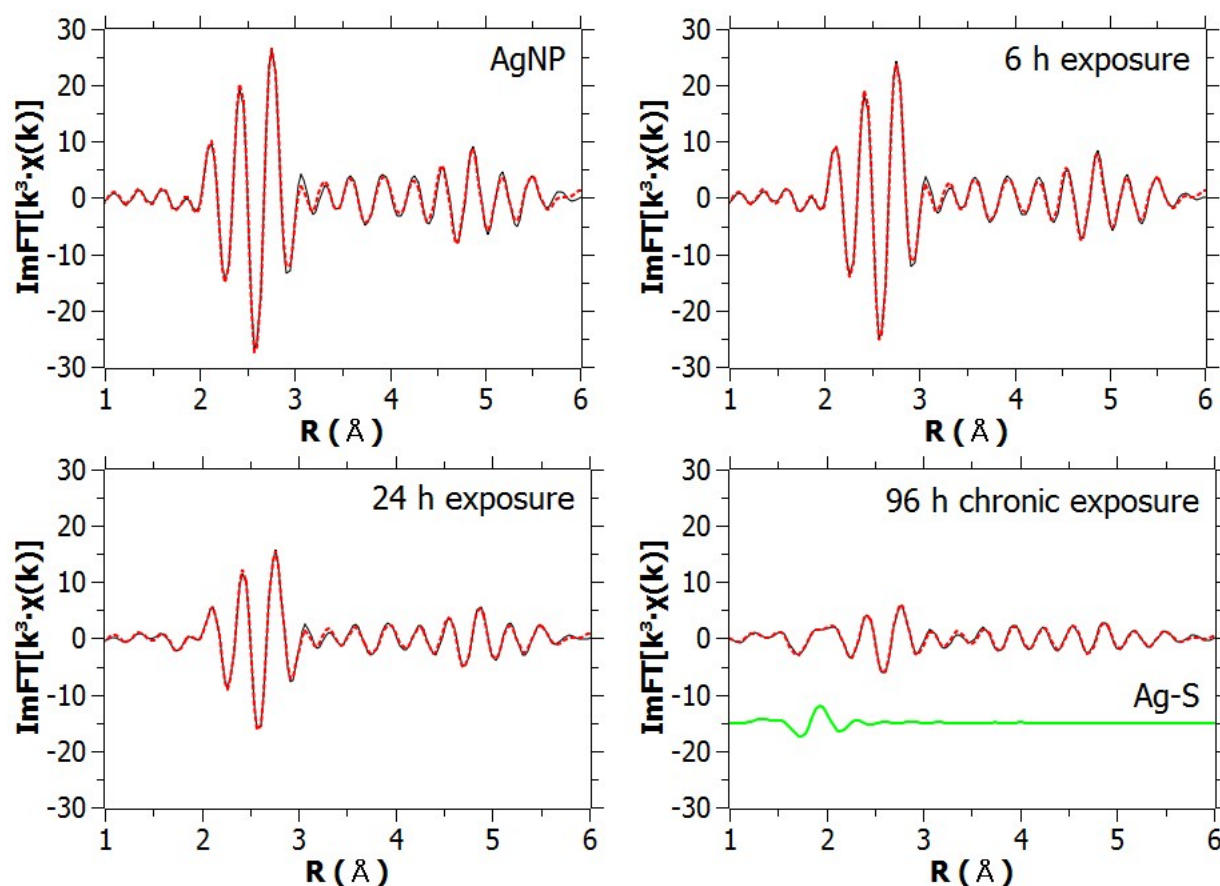

Supplement: c5nr00353a1.pdf [file c5nr00353a1.pdf]
